# Supplementary material for: Construction of a hierarchical tubular metal–organic framework composed of nanosheet arrays as a photothermal catalyst through phase transformation
Source: Royal Society of Chemistry journal article supplement (doi:10.1039/d2ta03397f), 2022-01-01
Supplement: d2ta03397f1.pdf [file d2ta03397f1.pdf]

## Supporting Information

### **Construction of hierarchical tubular metal–organic framework composed of nanosheet arrays as photothermal catalyst through phase transformation**

Huan Chen, Lei Shao, Chao Wang\* and Yu Fu\*

H. Chen, L. Shao, Prof. Y. Fu  
Department of Chemistry, College of Science  
Northeastern University  
Shenyang 110819, China  
E-mail: fuyu@mail.neu.edu.cn

C. Wang  
School of Medical Devices  
Shen Yang Pharmaceutical University  
Shenyang 110016, China  
E-mail: cherrywangchao@aliyun.com

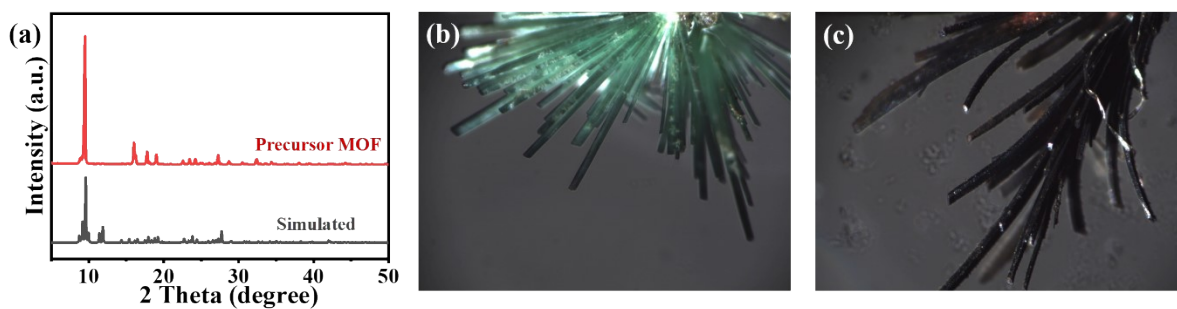

Figure S1. (a) PXRD patterns of prepared precursor MOF and the simulated precursor MOF; (b) optical microscope image of precursor MOF; (c) optical microscope image of MOF-74-HT

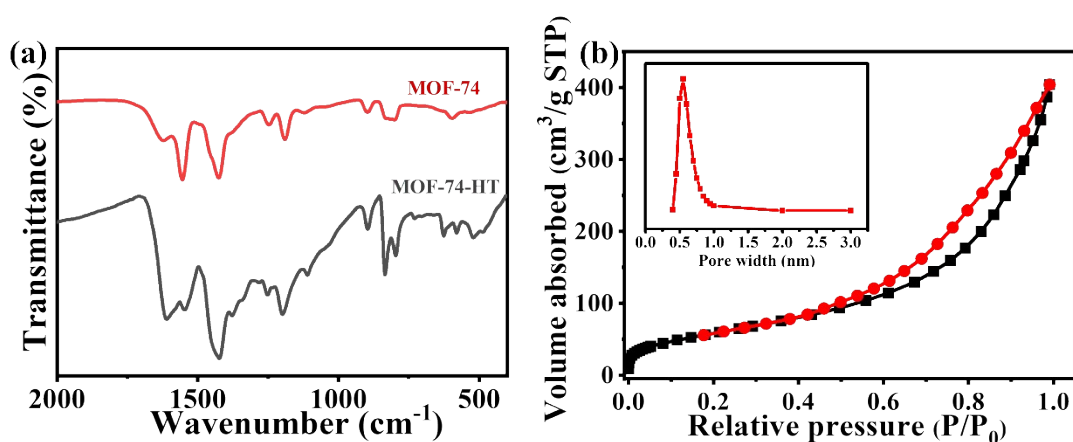

Figure S2. (a) FTIR spectrum of the MOF-74 and MOF-74-HT; (b) N<sub>2</sub> adsorption-desorption isotherms of MOF-74-HT.

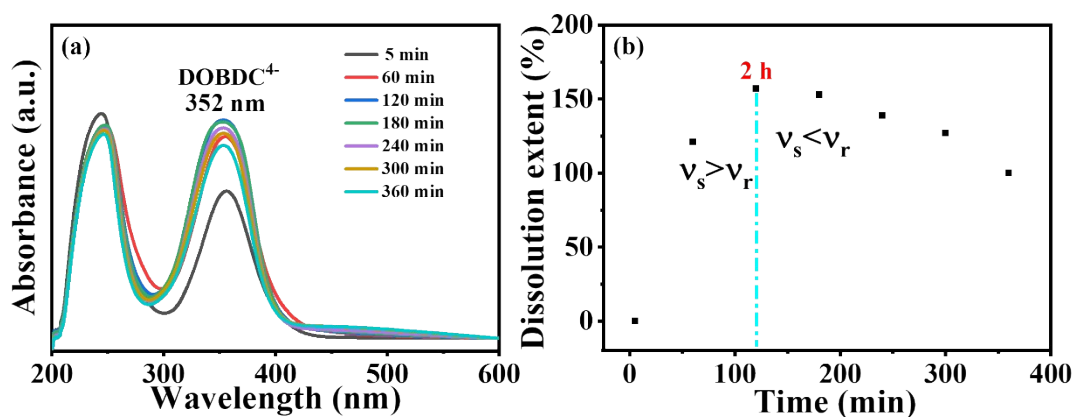

Figure S3. (a) UV-vis spectrum of precursor MOF immersed in SDBS/MeOH/H<sub>2</sub>O for different time; (b) the dissolution extent of precursor MOF in different time.

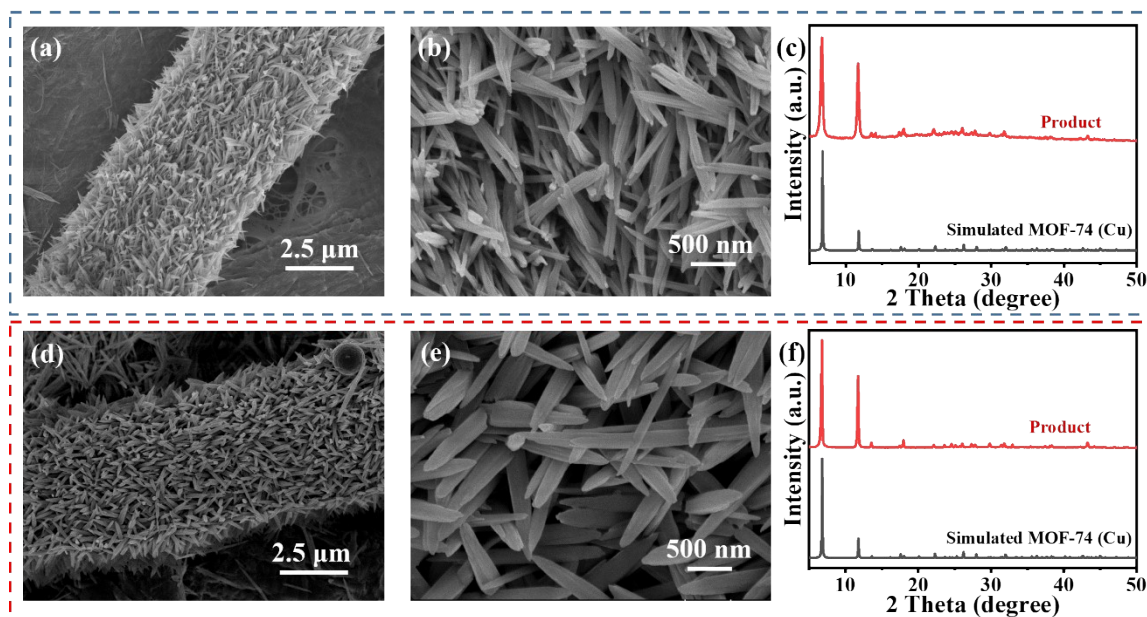

Figure S4. (a-b) SEM images of the product in MeOH; (c) PXRD patterns of the product in MeOH and simulated MOF-74 (Cu); (d-e) SEM images of the product in MeOH/H<sub>2</sub>O; (f) PXRD patterns of the product obtained in MeOH/H<sub>2</sub>O and simulated MOF-74 (Cu).

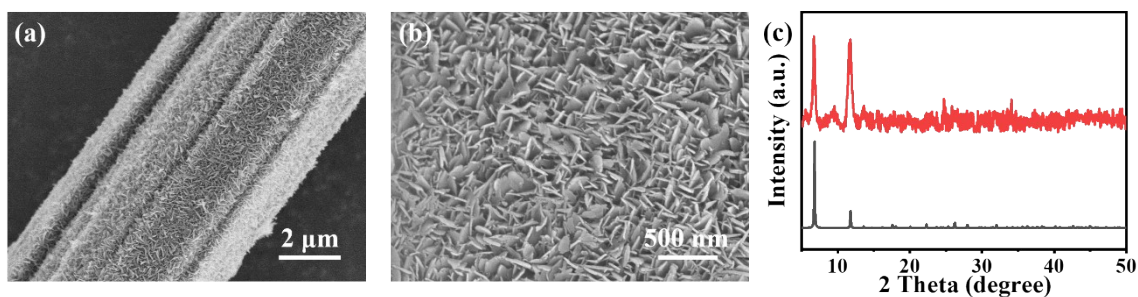

Figure S5. (a-b) SEM images of MOF-74-HT treated by ultrasonic for 30 min with different magnification; (c) PXRD pattern of MOF-74-HT treated by ultrasonic for 30 min and simulated MOF-74 (Cu).

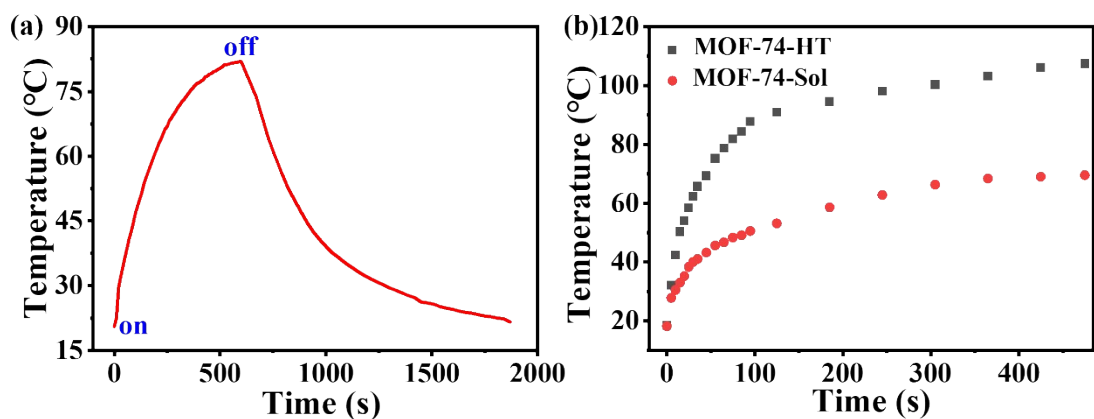

Figure S6. (a) The photothermal response of MOF-74-HT aqueous dispersion (400  $\mu\text{g/mL}$ ) under irradiation of 808 nm laser with 1.96 W; (b) the temperature–time curves of MOF-74-HT powder and MOF-74-Sol powder under the irradiation of Xe lamp.

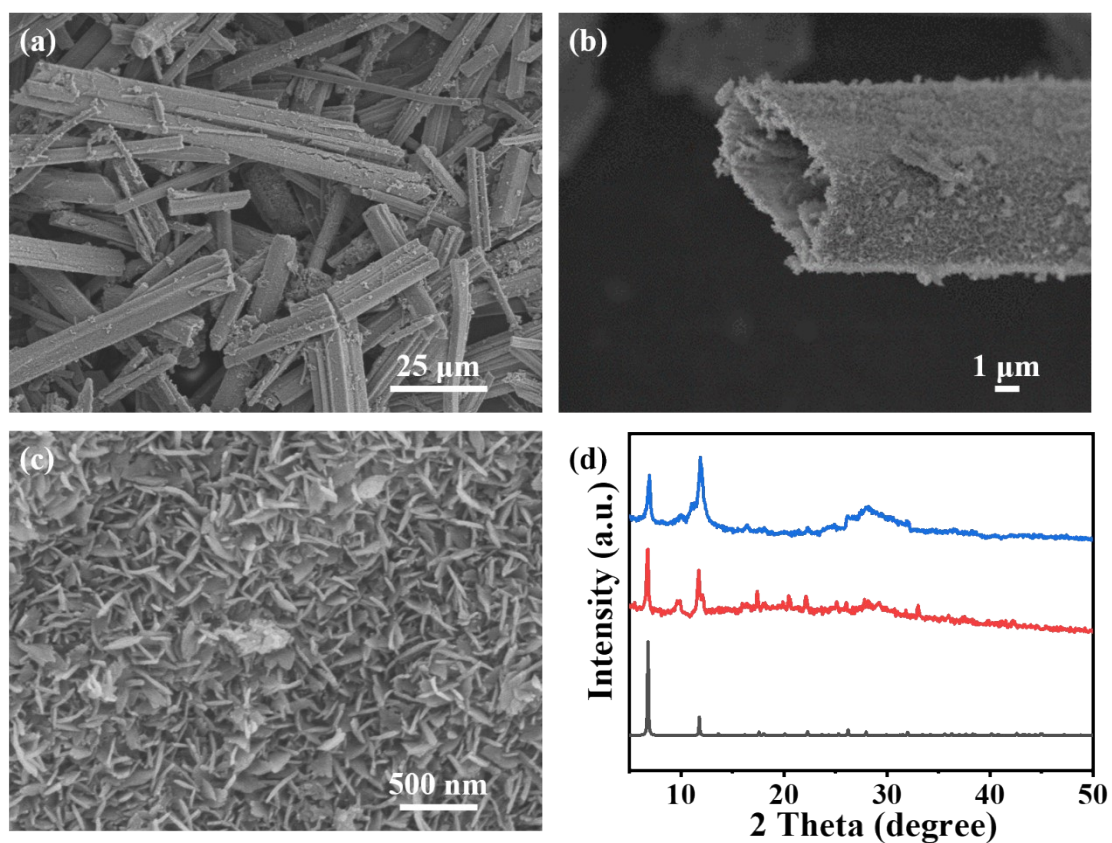

Figure S7. (a–c) SEM images of MOF-74-HT after being used as catalyst at different magnifications, (d) PXRD patterns of MOF-74-HT after reaction, before reaction and simulated MOF-74

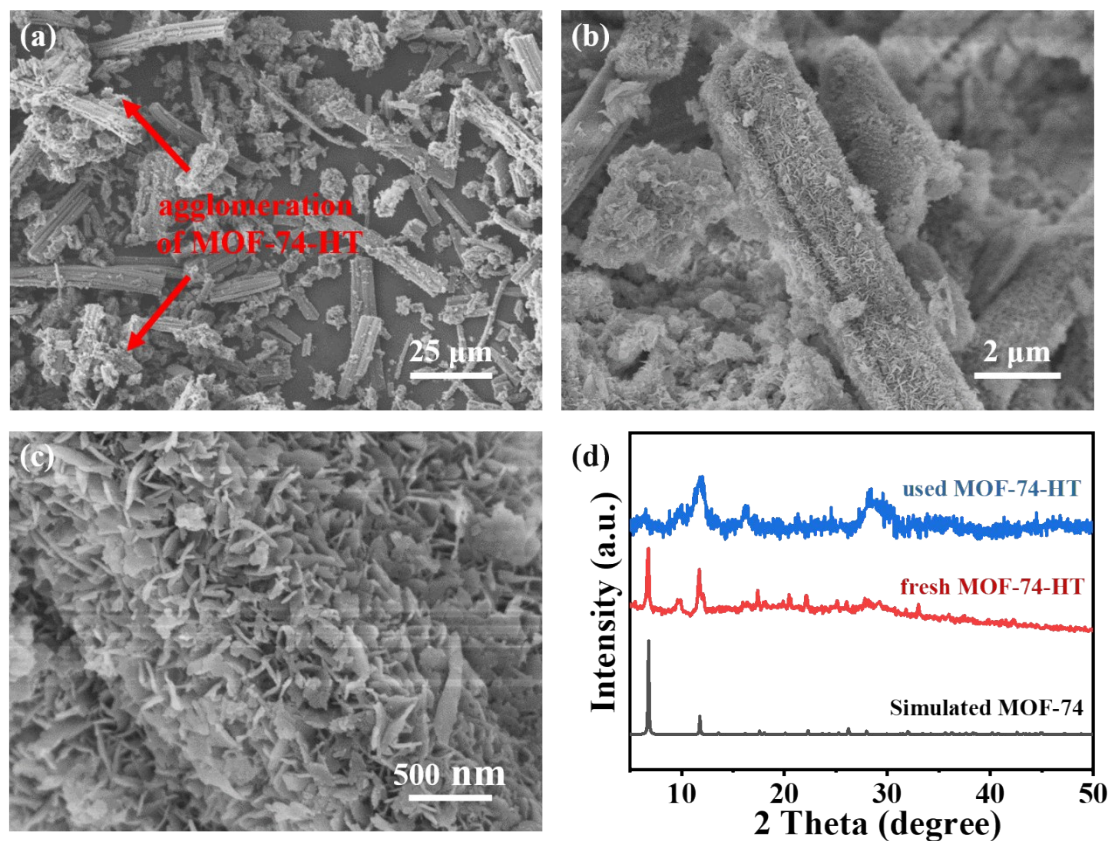

Figure S8. (a–c) SEM images of MOF-74-HT after the tenth cycles at different magnification, (d) PXRD patterns of MOF-74-HT after the tenth cycles (blue), fresh MOF-74-HT (red), and simulated MOF-74 (black).

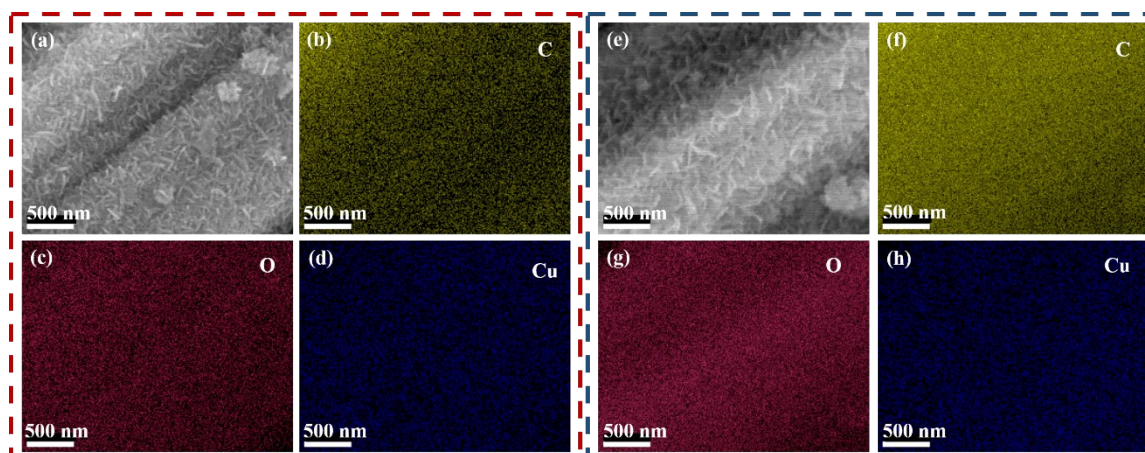

Figure S9. (a) SEM image of fresh MOF-74-HT, EDS mapping of C (b), O (c), and Cu (d) in fresh MOF-74-HT; (e) SEM image of used MOF-74-HT, EDS mapping of C (f), O (g), and Cu (h) in used MOF-74-HT

As shown in Figure S9, the element of C, O, and Cu distributed uniformly over the fresh MOF-74-HT and used MOF-74-HT, and there is no obvious difference in MOF-74-HT before and after reaction.

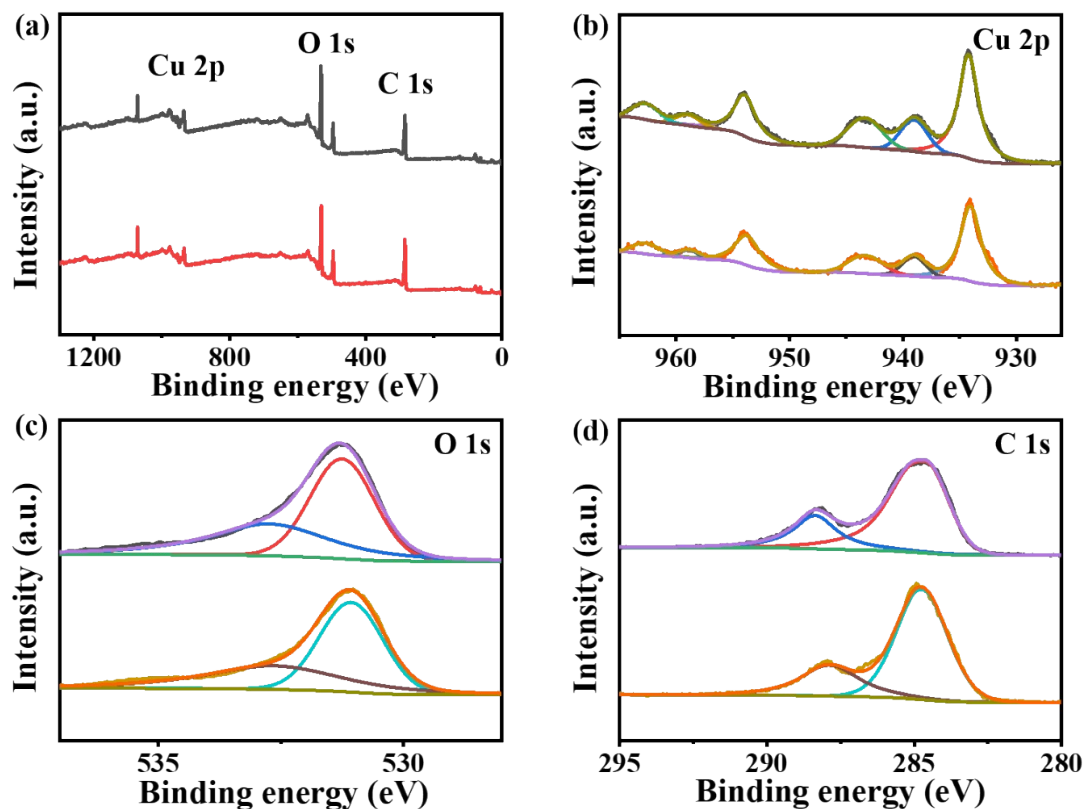

Figure S10. (a) XPS survey spectra of fresh MOF-74-HT (up) and used MOF-74-HT (down), high-resolution XPS spectra of Cu 2p (b), O 1s (c), and C 1s (d) in fresh MOF-74-HT (up) and used MOF-74-HT (down)

The XPS survey spectra confirmed the same elemental composition of MOF-74-HT before and after cycloaddition reaction, including C, O, and Cu, as shown in Figures S10a–10d. And the high-resolution XPS spectra of Cu 2p, O 1s, and C 1s also confirmed that the chemical states of elements in the used MOF-74-HT were almost identical to that of the fresh MOF-74-HT.

Table S1: The conversion of CO<sub>2</sub> cycloaddition reaction with various epoxides

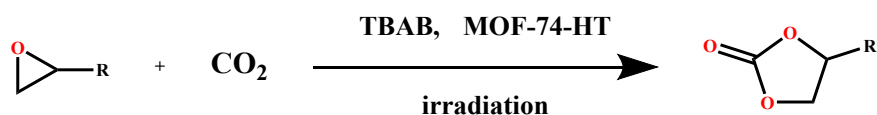

| Entry            | Substrate | Products | Time (h) | Conversion (%) |
|------------------|-----------|----------|----------|----------------|
| 1 <sup>[a]</sup> |           |          | 18       | 89.1           |
| 2 <sup>[a]</sup> |           |          | 18       | 87.3           |
| 3 <sup>[b]</sup> |           |          | 18       | 89.7           |
| 4 <sup>[a]</sup> |           |          | 18       | 86.3           |
| 5 <sup>[b]</sup> |           |          | 18       | 89.5           |
| 6 <sup>[b]</sup> |           |          | 18       | 70.8           |

[a]: Reaction conditions: 0.87 mmol substrate, 0.09 mmol TBAB, 15 mg catalyst, 1 bar CO<sub>2</sub>, 150 mW/cm<sup>2</sup> Xe lamp irradiation.

[b]: Reaction conditions: 0.87 mmol substrate, 0.09 mmol TBAB, 15 mg catalyst, 100 μL 1,4-Dioxane, 1 bar CO<sub>2</sub>, 150 mW/cm<sup>2</sup> Xe lamp irradiation.

Table S2. EA results of fresh MOF-74-HT and used MOF-74-HT

| Sample (MOF-74-HT) | C%    | H%    | O%     |
|--------------------|-------|-------|--------|
| fresh              | 31.59 | 1.921 | 29.031 |
| used               | 31.93 | 1.643 | 29.654 |

Table S3. ICP results of fresh MOF-74-HT and used MOF-74-HT

| Sample (MOF-74-HT) | Cu%  |
|--------------------|------|
| fresh              | 31.4 |
| used               | 29.8 |

The EA results revealed that the contents of C, O, and H in fresh MOF-74-HT and used MOF-74-HT were similar, indicating the unchanged organic compositions of MOF-74-HT before and after catalytic reaction, as shown in Table S2. However, the ICP results proved a slight decrease in Cu content in used MOF-74-HT compared with fresh MOF-74-HT caused by the leach of  $\text{Cu}^{2+}$  from MOF-74-HT during the catalytic process, as shown in Table S3. And it might be responsible for the slight decrease of conversion of  $\text{CO}_2$  cycloaddition with styrene oxide after 10 runs of catalytic reaction.
